# Supplementary material for: Construction of metal (Mn, Ce, Eu)-containing species in CN nanocomposites with photo-responsive oxidase-mimicking activity for multi-antioxidant discrimination
Source: Royal Society of Chemistry journal article supplement (doi:10.1039/d1nj06068f), 2022-01-01
Supplement: d1nj06068f1.pdf [file d1nj06068f1.pdf]

## **Supporting information**

### **Construction of metal (Mn, Ce, Eu)-containing species in CN with photo-responsive oxidase-mimicking activity for antioxidants discrimination**

Fan Du, Xiaojie Zhou, Yilian Bai, Qing Tang, Yunfei Cai\* and Yurong Tang\*

School of Chemistry and Chemical Engineering, Chongqing University, Chongqing  
400044, China

\*corresponding authors' E-mail: [tangyuronga@cqu.edu.cn](mailto:tangyuronga@cqu.edu.cn), [yf.cai@cqu.edu.cn](mailto:yf.cai@cqu.edu.cn)

## Experimental Section

### Materials and instruments

All reagents used in this work were analytical grade without further purification. Potassium Chloride(KCl),  $\text{MnCl}_2 \cdot 4\text{H}_2\text{O}$ ,  $\text{EuCl}_3 \cdot 6\text{H}_2\text{O}$ ,  $\text{CeCl}_3 \cdot 7\text{H}_2\text{O}$ , hydrochloric acid (HCl), sodium hydroxide (NaOH) and Melamine ( $\text{C}_3\text{H}_6\text{N}_6$ ) were brought from Kelong Reagent Company (Chengdu, China), ascorbic acid(AA), L-glutathione(GSH), Uric acid (UA), tannic acid (TCA), Dopamine (DA), L-cysteine(Cys) and Melatonin(MT) were purchased from Sangon Biotechnology Co. Ltd. (Shanghai, China). 3,3',5,5'-tetramethylbenzidine (TMB), 2,2'-azino-bis(3-ethylbenzthiazoline-6-sulfonic acid) (ABTS) and o-phenylenediamine (OPD) were obtained from Aladin (Shanghai, China). All solutions were prepared using Milli-Q ultrapure water (18.2 M $\Omega$ ).

Absorption measurements were performed on a TU-1901 spectrophotometer. X-ray diffraction (XRD) patterns were obtained on a Rigaku D/Max 2200PC diffractometer with Cu K $\alpha$  radiation. Transmission electron microscopy (TEM) analyses were performed on a Philips Tecnai G2F20 microscope. X-ray photoelectron spectrometer(XPS) was operated on a Kratos XSAM800 spectrometer with a monochromatic Al Xray source (Al KR, 1.4866 keV). Fourier Transform Infrared (FTIR) spectra from 4000 to 400  $\text{cm}^{-1}$  were recorded in KBr discs on a Nicolet IS10 FTIR spectrometer (Thermo Inc, America). Luminescence intensities were recorded using a RF-5301 RC. Photoluminescence spectras and lifetimes were recorded on an Edinburg Instruments FLS1000 spectrofluorometer at room temperature with a 450 W Xenon lamp and a 375 nm nanosecond Pulsed Diode laser (EPL), respectively.

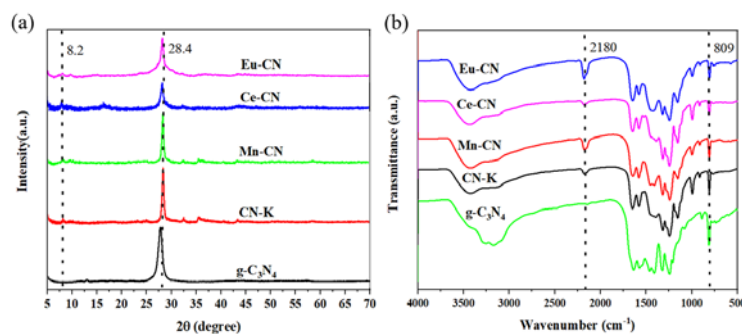

**Figure S1.** (a) XRD patterns and (b) FT-IR spectra of g-C<sub>3</sub>N<sub>4</sub>, CN-K, Mn-CN, Ce-CN and Eu-CN.

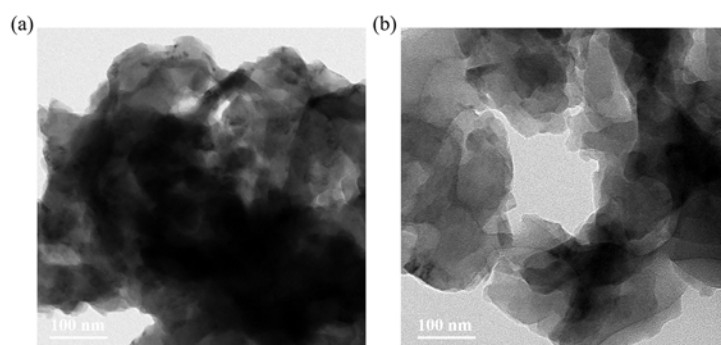

**Figure S2.** The TEM images of g-C<sub>3</sub>N<sub>4</sub> (a), CN-K (b).

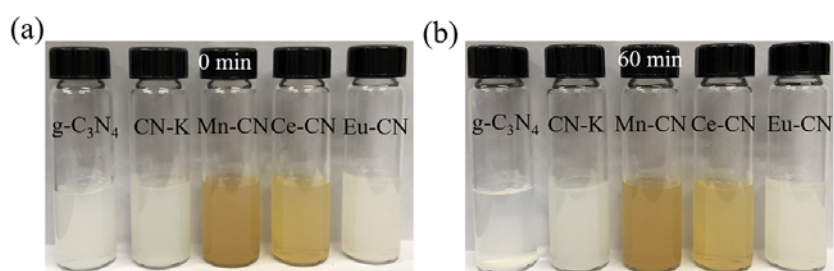

**Figure S3.** Suspension stability experiment. Pictures taken after different times: a) immediately after stop stirring; b) after 60 minutes.

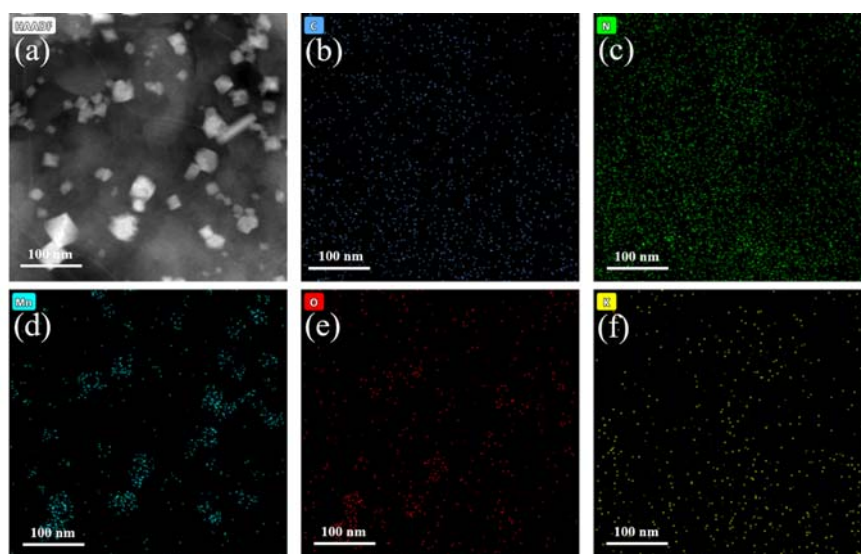

**Figure S4.** (a–f) HAADF-STEM elemental mapping images of the constituent elements in the Mn-CN catalyst.

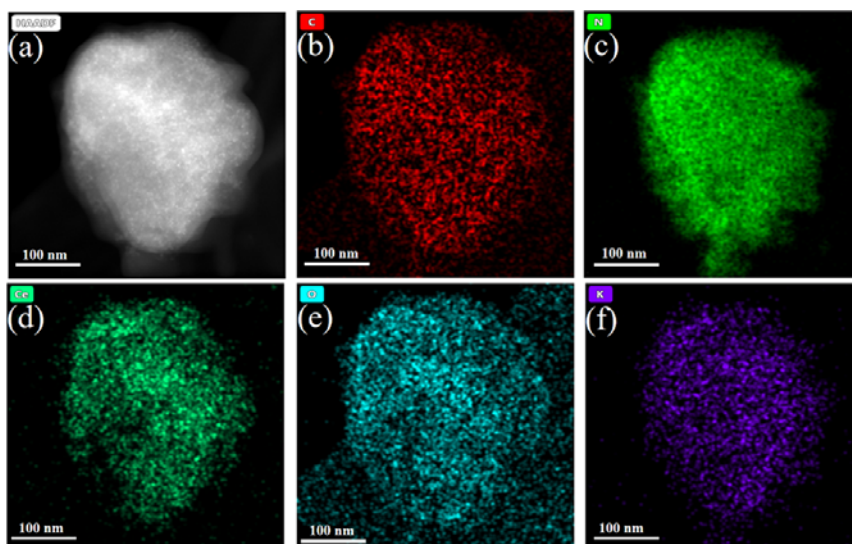

**Figure S5.** (a–f) HAADF-STEM elemental mapping images of the constituent elements in the Ce-CN catalyst.

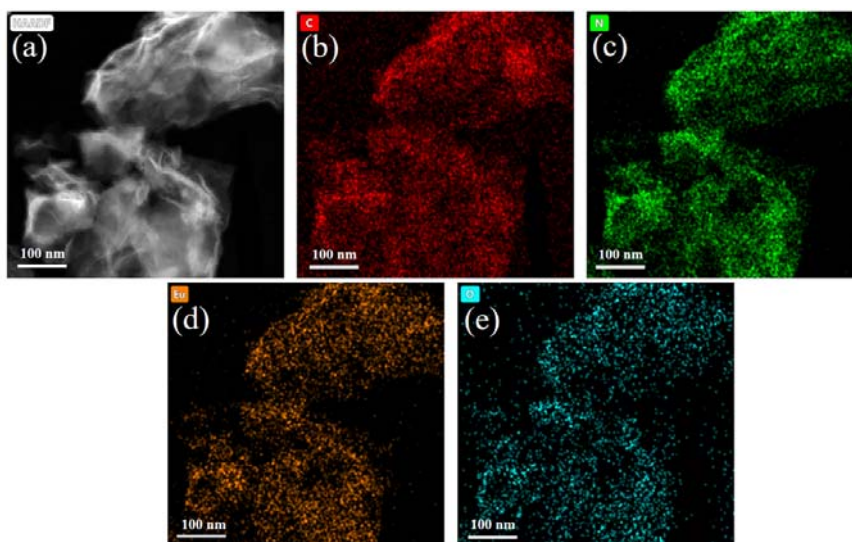

**Figure S6.** (a–e) HAADF-STEM elemental mapping images of the constituent elements in the Eu-CN catalyst.

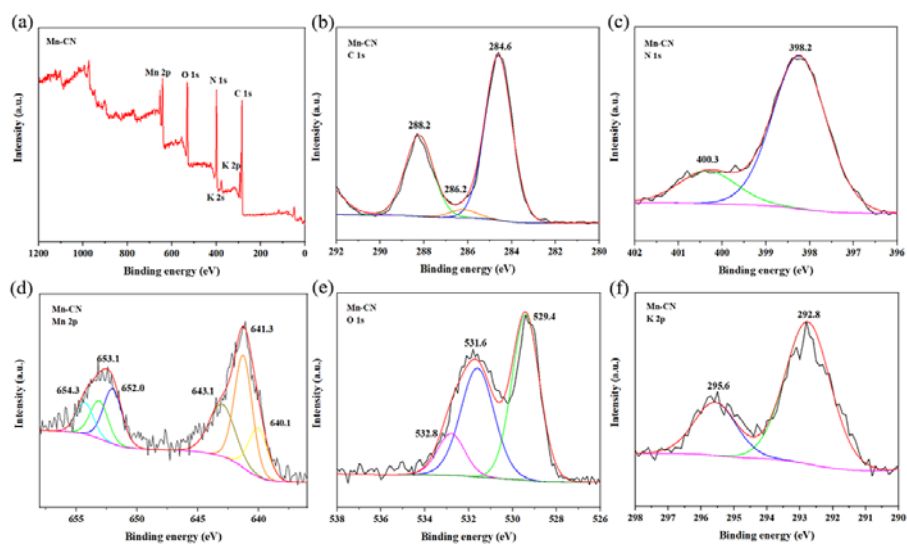

**Figure S7.** XPS spectrum of Mn-CN (a) survey spectra, (b) C 1s, (c) N 1s, (d) Mn 2p, (e) O 1s, (f) K 2p high-resolution spectra.

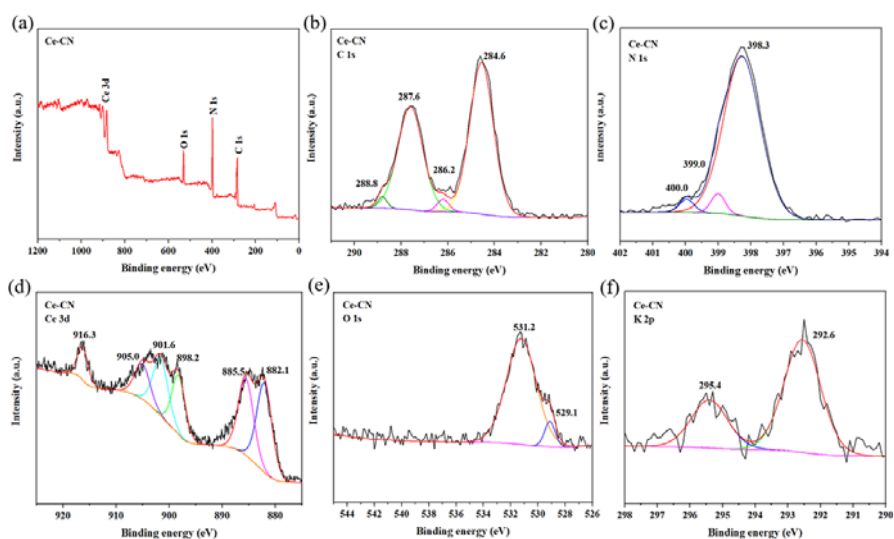

**Figure S8.** XPS spectrum of Ce-CN (a) survey spectra, (b) C 1s, (c) N 1s, (d) Ce 3d, (e) O 1s, (f) K 2p high-resolution spectra.

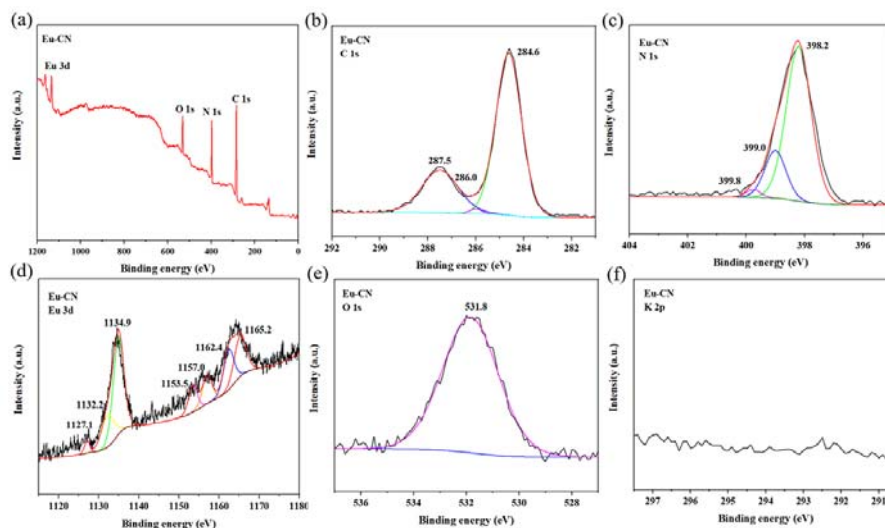

**Figure S9.** XPS spectrum of Eu-CN (a) survey spectra, (b) C 1s, (c) N 1s, (d) Eu 3d, (e) O 1s, (f) K 2p high-resolution spectra.

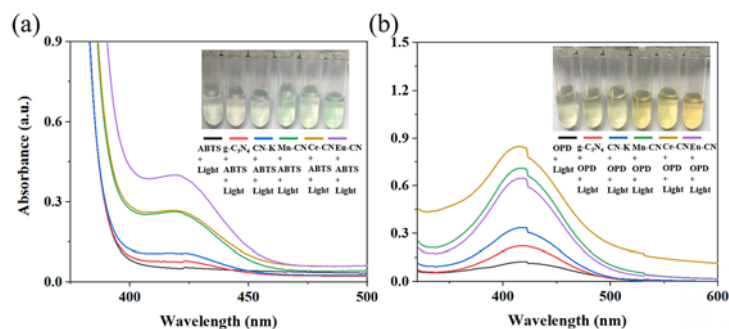

**Figure S10.** The UV-vis absorption curves of different reaction systems used (a) ABTS and (b) OPD as substrates.

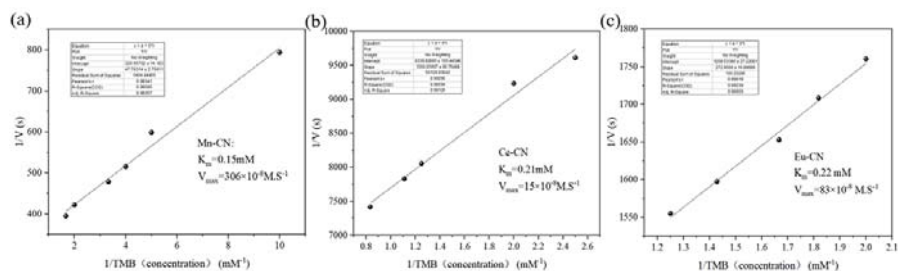

**Figure S11.** Steady-state kinetic analysis of (a) Mn-CN, (b) Ce-CN and (c) Eu-CN as photo-oxidase mimics to TMB. The velocity ( $v$ ) of the reaction was measured using  $30 \mu\text{g}\cdot\text{mL}^{-1}$  catalyst.

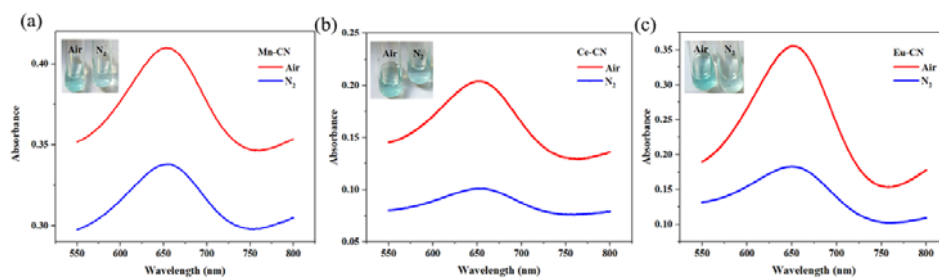

**Figure S12.** Effect of atmosphere for (a) Mn-CN, (b) Ce-CN and (c) Eu-CN catalyze oxidation coloration. Inset is the corresponding photograph.

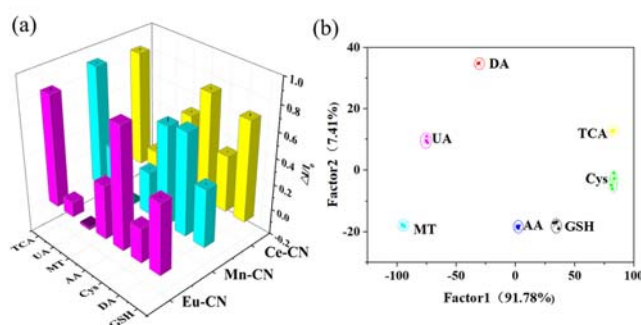

**Figure S13.** Fingerprints for seven antioxidants ( $3 \mu\text{M}$ ) generated from photocolometric response patterns. b) Canonical score plot for the triple-channel signal patterns obtained from LDA against seven antioxidants ( $3 \mu\text{M}$ ).

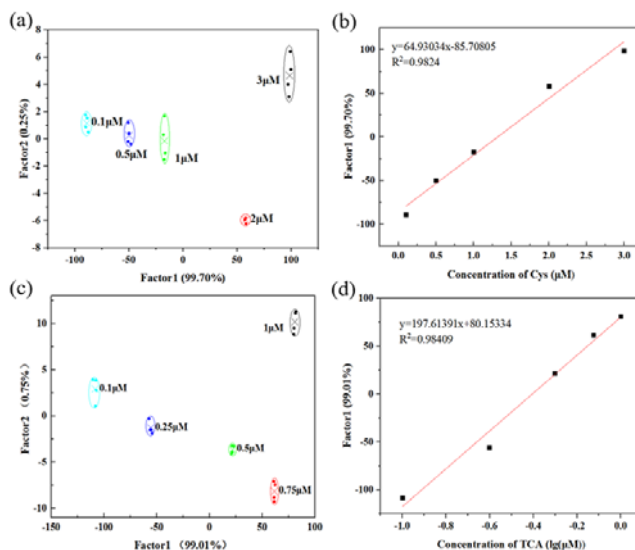

**Figure S14.** LDA plots for (a) Cys at different concentrations ( $0.1$ ,  $0.5$ ,  $1$ ,  $2$  and  $3 \mu\text{M}$ ), and (b) Plot of the discriminant factor 1 versus the Cys concentration. (c) TCA at various concentrations ( $0.1$ ,  $0.25$ ,  $0.5$ ,  $0.75$  and  $1 \mu\text{M}$ ) and (d) Plot of the discriminant factor 1 versus the logarithm of TCA concentration.

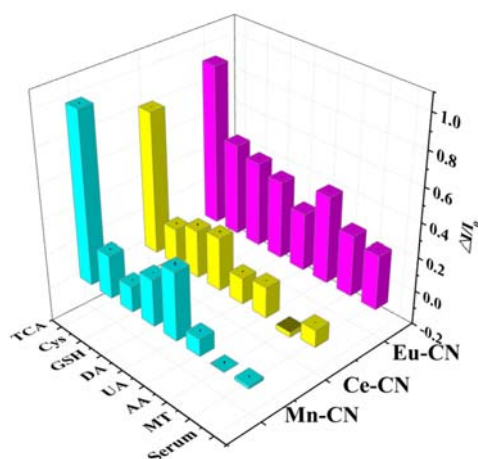

**Figure S15.** Fingerprints for seven antioxidants (1  $\mu\text{M}$ ) spiked in the human serum.

**Table S1.** Surface atomic ratios of all elements measured by XPS

| Sample | Atomic content (%) |        |        |       |       | C/N  |
|--------|--------------------|--------|--------|-------|-------|------|
|        | C                  | N      | O      | K     | M     |      |
| Mn-CN  | 26.96%             | 37.98% | 25.05% | 3.96% | 6.05% | 0.71 |
| Ce-CN  | 34.17%             | 43.82% | 17%    | 1.78% | 3.2%  | 0.78 |
| Eu-CN  | 36.2%              | 50.6%  | 10.38% | /     | 2.79% | 0.71 |

**Table S2.** Comparison of  $K_m$  and  $V_{max}$  of Mn-CN, Eu-CN, Ce-CN and the reported nanomaterials with oxidase-like activity.

| Catalyst                               | Substrate | $K_m/\text{mM}$       | $V_{max}/10^{-8} \text{ M.s}^{-1}$ | Reference |
|----------------------------------------|-----------|-----------------------|------------------------------------|-----------|
| HPR                                    | TMB       | $4.3 \times 10^{-1}$  | 10                                 | [S1]      |
| MSN-Au NPs                             | TMB       | $2.25 \times 10^{-1}$ | 12                                 | [S2]      |
| WS <sub>2</sub>                        | TMB       | 1.83                  | 4.31                               | [S3]      |
| Au/CeO <sub>2</sub> CSNPs              | TMB       | $2.9 \times 10^{-1}$  | 3.9                                | [S4]      |
| Porous g-C <sub>3</sub> N <sub>4</sub> | TMB       | $5.8 \times 10^{-1}$  | 5.84                               | [S5]      |
| GO-Fe <sub>3</sub> O <sub>4</sub> NPs  | TMB       | $4.3 \times 10^{-1}$  | 13.8                               | [S6]      |
| ZnFe <sub>2</sub> O <sub>4</sub>       | TMB       | 0.85                  | 13.31                              | [S7]      |
| Mn-CN                                  | TMB       | $1.5 \times 10^{-1}$  | 306                                | This work |
| Ce-CN                                  | TMB       | $2.1 \times 10^{-1}$  | 15                                 | This work |
| Eu-CN                                  | TMB       | $2.2 \times 10^{-1}$  | 83                                 | This work |

**Table S3.** The training matrix of the colorimetric response patterns against 7 antioxidants using this sensor assay at the concentration of 1  $\mu\text{M}$ .

| antioxidants | $I_0-I/I_0$ Eu-CN | $I_0-I/I_0$ Mn-CN | $I_0-I/I_0$ Ce-CN |
|--------------|-------------------|-------------------|-------------------|
| GSH          | 0.326769          | 0.165796          | 0.223489          |
| GSH          | 0.332429          | 0.169152          | 0.242142          |
| GSH          | 0.34009           | 0.1624            | 0.258722          |
| GSH          | 0.356476          | 0.160847          | 0.203454          |
| DA           | 0.15142           | 0.297906          | 0.190095          |



|     |          |          |          |
|-----|----------|----------|----------|
| DA  | 0.1461   | 0.290234 | 0.152716 |
| DA  | 0.13807  | 0.295248 | 0.198843 |
| DA  | 0.14885  | 0.290633 | 0.193493 |
| TCA | 0.868404 | 0.949537 | 0.820433 |
| TCA | 0.90073  | 0.948957 | 0.849214 |
| TCA | 0.888464 | 0.948912 | 0.862018 |
| TCA | 0.91162  | 0.955649 | 0.837469 |
| Cys | 0.309773 | 0.280073 | 0.404539 |
| Cys | 0.304993 | 0.298709 | 0.364619 |
| Cys | 0.31002  | 0.292742 | 0.360345 |
| Cys | 0.298709 | 0.302522 | 0.395845 |
| AA  | 0.285869 | 0.19782  | 0.390171 |
| AA  | 0.266825 | 0.194    | 0.389114 |
| AA  | 0.302915 | 0.19947  | 0.395949 |
| AA  | 0.278345 | 0.20093  | 0.398274 |
| MT  | 0.002462 | 0.090432 | 0.083266 |
| MT  | -0.0221  | 0.075818 | 0.091784 |
| MT  | -0.03847 | 0.098965 | 0.089434 |
| MT  | -0.06763 | 0.070521 | 0.078934 |
| UA  | -0.0146  | 0.309713 | 0.07563  |
| UA  | -0.01857 | 0.298398 | 0.069462 |
| UA  | -0.03476 | 0.298709 | 0.051766 |
| UA  | -0.04737 | 0.330035 | 0.054336 |

**Table S4.** The training matrix of the colorimetric response patterns against 7 antioxidants using this sensor assay at the concentration of 3 $\mu$ M.

| antioxidants | $I_0-I/I_0$ Eu-CN | $I_0-I/I_0$ Mn-CN | $I_0-I/I_0$ Ce-CN |
|--------------|-------------------|-------------------|-------------------|
| GSH          | 0.541386          | 0.446543          | 0.756927          |
| GSH          | 0.538172          | 0.442377          | 0.754686          |
| GSH          | 0.521068          | 0.434044          | 0.754252          |
| GSH          | 0.530655          | 0.428973          | 0.783317          |
| DA           | 0.257579          | 0.765159          | 0.424113          |
| DA           | 0.257633          | 0.767921          | 0.429474          |
| DA           | 0.258014          | 0.767876          | 0.430722          |
| DA           | 0.266294          | 0.769144          | 0.422425          |
| Cys          | 0.907624          | 0.768235          | 0.830469          |
| Cys          | 0.903198          | 0.753452          | 0.837424          |
| Cys          | 0.901947          | 0.722747          | 0.819094          |
| Cys          | 0.904064          | 0.713331          | 0.824745          |
| AA           | 0.394305          | 0.319307          | 0.597237          |
| AA           | 0.409735          | 0.323267          | 0.593782          |
| AA           | 0.405065          | 0.313366          | 0.593092          |

|     |          |          |          |
|-----|----------|----------|----------|
| AA  | 0.404862 | 0.314356 | 0.582729 |
| MT  | -0.00695 | -0.00865 | 0.118364 |
| MT  | -0.02116 | -0.01223 | 0.113371 |
| MT  | -0.02329 | -0.00815 | 0.108892 |
| MT  | -0.02291 | -0.00471 | 0.125927 |
| UA  | 0.119161 | 0.345786 | 0.15963  |
| UA  | 0.114749 | 0.343477 | 0.171672 |
| UA  | 0.11306  | 0.346602 | 0.161686 |
| UA  | 0.111698 | 0.363402 | 0.168588 |
| TCA | 0.834309 | 0.90945  | 0.891333 |
| TCA | 0.836066 | 0.914195 | 0.892    |
| TCA | 0.864754 | 0.920127 | 0.874    |
| TCA | 0.86534  | 0.914986 | 0.873333 |

**Table S5.** Identification of blind samples with 1 $\mu$ M antioxidants.

| <b>Samples</b> | <b>Eu-CN</b> | <b>Mn-CN</b> | <b>Ce-CN</b> | <b>Identification</b> | <b>Verification</b> |
|----------------|--------------|--------------|--------------|-----------------------|---------------------|
| 1              | 0.287745     | 0.196253     | 0.394521     | AA                    | AA                  |
| 2              | -0.045261    | 0.087426     | 0.077314     | MT                    | MT                  |
| 3              | 0.305743     | 0.297803     | 0.367415     | Cys                   | Cys                 |
| 4              | 0.149971     | 0.295246     | 0.200121     | DA                    | DA                  |
| 5              | 0.327964     | 0.165742     | 0.239471     | GSH                   | GSH                 |
| 6              | 0.896641     | 0.948963     | 0.838049     | TCA                   | TCA                 |
| 7              | -0.023196    | 0.327461     | 0.061594     | UA                    | UA                  |
| 8              | 0.340053     | 0.168916     | 0.240573     | GSH                   | GSH                 |
| 9              | 0.341279     | 0.162544     | 0.251126     | GSH                   | GSH                 |
| 10             | -0.032792    | 0.330124     | 0.058699     | UA                    | UA                  |
| 11             | 0.900021     | 0.952347     | 0.845911     | TCA                   | TCA                 |
| 12             | 0.141573     | 0.291733     | 0.197523     | DA                    | DA                  |
| 13             | 0.302911     | 0.286411     | 0.375273     | Cys                   | Cys                 |
| 14             | -0.051523    | 0.073229     | 0.079428     | MT                    | MT                  |
| 15             | 0.279562     | 0.195791     | 0.394733     | AA                    | AA                  |
| 16             | 0.879643     | 0.954159     | 0.861672     | TCA                   | TCA                 |
| 17             | 0.152475     | 0.294223     | 0.198814     | DA                    | DA                  |
| 18             | 0.299752     | 0.301724     | 0.396691     | Cys                   | Cys                 |
| 19             | 0.001321     | 0.095231     | 0.090377     | MT                    | MT                  |
| 20             | 0.294673     | 0.281252     | 0.392547     | AA                    | Cys                 |
| 21             | -0.019971    | 0.298563     | 0.057323     | UA                    | UA                  |
| 22             | 0.333097     | 0.164756     | 0.236782     | GSH                   | GSH                 |
| 23             | -0.031246    | 0.307942     | 0.053496     | UA                    | UA                  |
| 24             | 0.884124     | 0.947612     | 0.857914     | TCA                   | TCA                 |
| 25             | 0.285673     | 0.196625     | 0.399122     | AA                    | AA                  |
| 26             | 0.002154     | 0.072688     | 0.088697     | MT                    | MT                  |
| 27             | 0.137982     | 0.300107     | 0.195739     | DA                    | DA                  |

**Table S6.** The training matrix of the colorimetric response patterns against Cys at different concentration using this sensor assay.

| <b>antioxidants</b> | <b>I<sub>0</sub>-I/I<sub>0</sub> Eu-CN</b> | <b>I<sub>0</sub>-I/I<sub>0</sub> Mn-CN</b> | <b>I<sub>0</sub>-I/I<sub>0</sub> Ce-CN</b> |
|---------------------|--------------------------------------------|--------------------------------------------|--------------------------------------------|
| Cys 5μM             | 0.969016                                   | 0.984943                                   | 0.912554                                   |
| Cys 5μM             | 0.955833                                   | 0.985944                                   | 0.903425                                   |
| Cys 5μM             | 0.954582                                   | 0.983761                                   | 0.906106                                   |
| Cys 5μM             | 0.967284                                   | 0.985171                                   | 0.928899                                   |
| Cys 3μM             | 0.907624                                   | 0.768235                                   | 0.830469                                   |
| Cys 3μM             | 0.903198                                   | 0.753451                                   | 0.837424                                   |
| Cys 3μM             | 0.901947                                   | 0.722747                                   | 0.819094                                   |
| Cys 3μM             | 0.904064                                   | 0.71333                                    | 0.824745                                   |
| Cys 1μM             | 0.24076                                    | 0.292742                                   | 0.404539                                   |
| Cys 1μM             | 0.280073                                   | 0.284008                                   | 0.364619                                   |
| Cys 1μM             | 0.298709                                   | 0.302522                                   | 0.360345                                   |
| Cys 1μM             | 0.243466                                   | 0.279096                                   | 0.395845                                   |
| Cys 0.5μM           | 0.174584                                   | 0.14777                                    | 0.208708                                   |
| Cys 0.5μM           | 0.149565                                   | 0.168649                                   | 0.206245                                   |
| Cys 0.5μM           | 0.153607                                   | 0.145177                                   | 0.20319                                    |
| Cys 0.5μM           | 0.184014                                   | 0.145632                                   | 0.190082                                   |
| Cys 0.1μM           | 0.007538                                   | 0.009712                                   | 0.023809                                   |
| Cys 0.1μM           | -0.01806                                   | 0.013169                                   | 0.022776                                   |
| Cys 0.1μM           | -0.01738                                   | 0.025087                                   | 0.02092                                    |
| Cys 0.1μM           | 0.004747                                   | 0.020038                                   | 0.017515                                   |

**Table S7.** The training matrix of the colorimetric response patterns against TCA at different concentration using this sensor assay.

| <b>antioxidants</b> | <b>I<sub>0</sub>-I/I<sub>0</sub> Eu-CN</b> | <b>I<sub>0</sub>-I/I<sub>0</sub> Mn-CN</b> | <b>I<sub>0</sub>-I/I<sub>0</sub> Ce-CN</b> |
|---------------------|--------------------------------------------|--------------------------------------------|--------------------------------------------|
| TCA 5μM             | 0.977752                                   | 0.965758                                   | 0.954741                                   |
| TCA 5μM             | 0.97786                                    | 0.977668                                   | 0.972322                                   |
| TCA 5μM             | 0.976136                                   | 0.981876                                   | 0.974646                                   |
| TCA 5μM             | 0.978614                                   | 0.969448                                   | 0.963604                                   |
| TCA 1μM             | 0.752902                                   | 0.877683                                   | 0.875774                                   |
| TCA 1μM             | 0.781507                                   | 0.883707                                   | 0.872868                                   |
| TCA 1μM             | 0.778867                                   | 0.894363                                   | 0.87236                                    |
| TCA 1μM             | 0.745684                                   | 0.8939                                     | 0.87127                                    |
| TCA 0.5μM           | 0.387238                                   | 0.814672                                   | 0.642578                                   |
| TCA 0.5μM           | 0.374579                                   | 0.812355                                   | 0.654783                                   |
| TCA 0.5μM           | 0.378242                                   | 0.815135                                   | 0.652386                                   |
| TCA 0.5μM           | 0.390955                                   | 0.816988                                   | 0.653984                                   |
| TCA 0.25μM          | 0.118                                      | 0.490811                                   | 0.333684                                   |

|                  |          |          |          |
|------------------|----------|----------|----------|
| TCA 0.25 $\mu$ M | 0.114553 | 0.51861  | 0.334919 |
| TCA 0.25 $\mu$ M | 0.113314 | 0.509344 | 0.33521  |
| TCA 0.25 $\mu$ M | 0.111051 | 0.506564 | 0.333975 |
| TCA 0.1 $\mu$ M  | -0.04743 | 0.238301 | 0.156063 |
| TCA 0.1 $\mu$ M  | -0.0449  | 0.233205 | 0.194057 |
| TCA 0.1 $\mu$ M  | -0.07614 | 0.254054 | 0.187519 |
| TCA 0.1 $\mu$ M  | -0.04926 | 0.255907 | 0.172191 |

**Table S8.** Training matrix of response patterns against Cys, AA, TCA at different concentration

| <b>antioxidants</b> | <b>I<sub>0</sub>-I/I<sub>0</sub> Eu-CN</b> | <b>I<sub>0</sub>-I/I<sub>0</sub> Mn-CN</b> | <b>I<sub>0</sub>-I/I<sub>0</sub> Ce-CN</b> |
|---------------------|--------------------------------------------|--------------------------------------------|--------------------------------------------|
| TCA 5 $\mu$ M       | 0.977752                                   | 0.965758                                   | 0.954741                                   |
| TCA 5 $\mu$ M       | 0.97786                                    | 0.977668                                   | 0.972322                                   |
| TCA 5 $\mu$ M       | 0.976136                                   | 0.981876                                   | 0.974646                                   |
| TCA 5 $\mu$ M       | 0.978614                                   | 0.969448                                   | 0.963604                                   |
| TCA 1 $\mu$ M       | 0.752902                                   | 0.877683                                   | 0.875774                                   |
| TCA 1 $\mu$ M       | 0.781507                                   | 0.883707                                   | 0.872868                                   |
| TCA 1 $\mu$ M       | 0.778867                                   | 0.894363                                   | 0.87236                                    |
| TCA 1 $\mu$ M       | 0.745684                                   | 0.8939                                     | 0.87127                                    |
| TCA 0.5 $\mu$ M     | 0.387238                                   | 0.814672                                   | 0.642578                                   |
| TCA 0.5 $\mu$ M     | 0.374579                                   | 0.812355                                   | 0.654783                                   |
| TCA 0.5 $\mu$ M     | 0.378242                                   | 0.815135                                   | 0.652386                                   |
| TCA 0.5 $\mu$ M     | 0.390955                                   | 0.816988                                   | 0.653984                                   |
| Cys 5 $\mu$ M       | 0.969016                                   | 0.984943                                   | 0.912554                                   |
| Cys 5 $\mu$ M       | 0.955833                                   | 0.985944                                   | 0.903425                                   |
| Cys 5 $\mu$ M       | 0.954582                                   | 0.983761                                   | 0.906106                                   |
| Cys 5 $\mu$ M       | 0.967284                                   | 0.985171                                   | 0.928899                                   |
| Cys 1 $\mu$ M       | 0.24076                                    | 0.292742                                   | 0.404539                                   |
| Cys 1 $\mu$ M       | 0.280073                                   | 0.284008                                   | 0.364619                                   |
| Cys 1 $\mu$ M       | 0.298709                                   | 0.302522                                   | 0.360345                                   |
| Cys 1 $\mu$ M       | 0.243466                                   | 0.279096                                   | 0.395845                                   |
| Cys 0.5 $\mu$ M     | 0.174584                                   | 0.14777                                    | 0.208708                                   |
| Cys 0.5 $\mu$ M     | 0.149565                                   | 0.168649                                   | 0.206245                                   |
| Cys 0.5 $\mu$ M     | 0.153607                                   | 0.145177                                   | 0.20319                                    |
| Cys 0.5 $\mu$ M     | 0.184014                                   | 0.145632                                   | 0.190082                                   |
| AA 5 $\mu$ M        | 0.772928                                   | 0.712779                                   | 0.73886                                    |
| AA 5 $\mu$ M        | 0.717556                                   | 0.707516                                   | 0.760967                                   |
| AA 5 $\mu$ M        | 0.759478                                   | 0.709128                                   | 0.75544                                    |
| AA 5 $\mu$ M        | 0.757245                                   | 0.712542                                   | 0.760276                                   |
| AA 1 $\mu$ M        | 0.126024                                   | 0.139                                      | 0.390171                                   |
| AA 1 $\mu$ M        | 0.128711                                   | 0.137293                                   | 0.389114                                   |
| AA 1 $\mu$ M        | 0.123788                                   | 0.143646                                   | 0.395949                                   |
| AA 1 $\mu$ M        | 0.122925                                   | 0.146681                                   | 0.398274                                   |

|                |          |          |          |
|----------------|----------|----------|----------|
| AA 0.5 $\mu$ M | 0.053444 | 0.098652 | 0.276731 |
| AA 0.5 $\mu$ M | 0.042481 | 0.0877   | 0.276026 |
| AA 0.5 $\mu$ M | 0.05182  | 0.090497 | 0.289625 |
| AA 0.5 $\mu$ M | 0.052276 | 0.066934 | 0.286947 |

**Table S9.** The training matrix of the colorimetric response patterns against the mixture of TCA and UA at 0.75  $\mu$ M using this sensor assay.

| antioxidants | $I_0-I/I_0$ Eu-CN | $I_0-I/I_0$ Mn-CN | $I_0-I/I_0$ Ce-CN |
|--------------|-------------------|-------------------|-------------------|
| TCA          | 0.60518           | 0.971154          | 0.824738          |
| TCA          | 0.586553          | 0.972754          | 0.825078          |
| TCA          | 0.583246          | 0.972604          | 0.819172          |
| TCA          | 0.590962          | 0.976203          | 0.819104          |
| TCA/UA 75:25 | 0.523009          | 0.969704          | 0.719323          |
| TCA/UA 75:25 | 0.517994          | 0.970904          | 0.722038          |
| TCA/UA 75:25 | 0.503004          | 0.973354          | 0.725364          |
| TCA/UA 75:25 | 0.50124           | 0.971704          | 0.706698          |
| TCA/UA 50:50 | 0.291099          | 0.846921          | 0.612483          |
| TCA/UA 50:50 | 0.289722          | 0.849621          | 0.610243          |
| TCA/UA 50:50 | 0.28895           | 0.845621          | 0.613501          |
| TCA/UA 50:50 | 0.285699          | 0.849871          | 0.62314           |
| TCA/UA 25:75 | 0.115955          | 0.676195          | 0.294948          |
| TCA/UA 25:75 | 0.107964          | 0.675445          | 0.31375           |
| TCA/UA 25:75 | 0.110554          | 0.657147          | 0.306216          |
| TCA/UA 25:75 | 0.106751          | 0.654198          | 0.302075          |
| UA           | 0.003582          | 0.371886          | -0.0699           |
| UA           | 0.021163          | 0.364337          | -0.04757          |
| UA           | 0.010251          | 0.365987          | -0.05327          |
| UA           | 0.022706          | 0.368987          | -0.06189          |

**Table S10.** The training matrix of the colorimetric response patterns against the antioxidants at 1  $\mu$ M in serum samples using this sensor assay.

| antioxidants | $I_0-I/I_0$ Eu-CN | $I_0-I/I_0$ Mn-CN | $I_0-I/I_0$ Ce-CN |
|--------------|-------------------|-------------------|-------------------|
| GSH          | 0.490201          | 0.152234          | 0.260061          |
| GSH          | 0.492018          | 0.145119          | 0.277948          |
| GSH          | 0.490006          | 0.147259          | 0.274371          |
| GSH          | 0.483452          | 0.143033          | 0.270857          |
| DA           | 0.451463          | 0.271713          | 0.292349          |
| DA           | 0.443344          | 0.268812          | 0.305581          |
| DA           | 0.441556          | 0.269984          | 0.308136          |
| DA           | 0.442322          | 0.267251          | 0.304664          |
| Cys          | 0.535260          | 0.256285          | 0.212694          |
| Cys          | 0.530306          | 0.242644          | 0.210860          |
| Cys          | 0.531430          | 0.244249          | 0.202869          |

|       |          |           |           |
|-------|----------|-----------|-----------|
| Cys   | 0.527600 | 0.248207  | 0.201034  |
| MT    | 0.348465 | -0.016869 | -0.029346 |
| MT    | 0.346422 | 0.008809  | -0.029673 |
| MT    | 0.348363 | 0.007632  | -0.025874 |
| MT    | 0.343154 | 0.007204  | -0.033407 |
| TCA   | 0.933615 | 0.982773  | 0.817426  |
| TCA   | 0.930449 | 0.990745  | 0.817299  |
| TCA   | 0.929479 | 0.989728  | 0.819087  |
| TCA   | 0.930705 | 0.983362  | 0.820620  |
| UA    | 0.329850 | 0.373016  | 0.145074  |
| UA    | 0.328358 | 0.403937  | 0.145138  |
| UA    | 0.327839 | 0.405488  | 0.152996  |
| UA    | 0.327449 | 0.382217  | 0.153634  |
| AA    | 0.499351 | 0.100407  | 0.175546  |
| AA    | 0.494419 | 0.088581  | 0.179506  |
| AA    | 0.493380 | 0.106096  | 0.177398  |
| AA    | 0.500778 | 0.101969  | 0.174715  |
| Serum | 0.316294 | 0.017403  | 0.097994  |
| Serum | 0.313537 | 0.026496  | 0.096141  |
| Serum | 0.309094 | 0.014559  | 0.097930  |
| Serum | 0.307205 | 0.012327  | 0.099910  |

**Table S11.** The training matrix of the colorimetric response patterns against antioxidant mixtures at 1  $\mu$ M in serum samples using this sensor assay.

| antioxidants | $I_0-I/I_0$ Eu-CN | $I_0-I/I_0$ Mn-CN | $I_0-I/I_0$ Ce-CN |
|--------------|-------------------|-------------------|-------------------|
| Serum        | 0.25726919        | 0.031759          | 0.138017739       |
| Serum        | 0.31044829        | 0.013463          | 0.135842652       |
| Serum        | 0.24430012        | 0.022496          | 0.137138448       |
| Serum        | 0.26897037        | -0.00162          | 0.134778248       |
| GSH          | 0.50652401        | 0.279199          | 0.256305437       |
| GSH          | 0.49710811        | 0.35046           | 0.253251059       |
| GSH          | 0.49456168        | 0.273585          | 0.253112224       |
| GSH          | 0.45518072        | 0.273897          | 0.256814499       |
| UA           | 0.32768116        | 0.295182          | 0.12344003        |
| UA           | 0.30162459        | 0.297287          | 0.125855764       |
| UA           | 0.27698928        | 0.30828           | 0.123069802       |
| UA           | 0.27651552        | 0.297287          | 0.109047434       |
| TCA          | 0.80291755        | 0.930376          | 0.810212109       |
| TCA          | 0.79421228        | 0.92905           | 0.801141535       |
| TCA          | 0.79622574        | 0.926166          | 0.801419205       |
| TCA          | 0.7966995         | 0.92944           | 0.796745083       |
| TCA+UA       | 0.41603664        | 0.908311          | 0.53661396        |
| TCA+UA       | 0.42346151        | 0.903945          | 0.541149247       |

|            |             |             |             |
|------------|-------------|-------------|-------------|
| TCA+UA     | 0.447362    | 0.929674    | 0.526293867 |
| TCA+UA     | 0.43386717  | 0.923281    | 0.549757037 |
| TCA+GSH    | 0.58707964  | 0.939498    | 0.609548785 |
| TCA+GSH    | 0.57672818  | 0.927803    | 0.618526802 |
| TCA+GSH    | 0.56675609  | 0.932949    | 0.619128422 |
| TCA+GSH    | 0.56204103  | 0.9356      | 0.603208638 |
| UA+GSH     | 0.40048235  | 0.496647    | 0.189849594 |
| UA+GSH     | 0.37674444  | 0.495946    | 0.198688776 |
| UA+GSH     | 0.38877598  | 0.493685    | 0.20391824  |
| UA+GSH     | 0.37132482  | 0.493919    | 0.200725028 |
| UA+TCA+GSH | 0.52280302  | 0.914549    | 0.465715387 |
| UA+TCA+GSH | 0.52811425  | 0.918447    | 0.462290782 |
| UA+TCA+GSH | 0.53369645  | 0.919149    | 0.442900115 |
| UA+TCA+GSH | 0.533750644 | 0.922579136 | 0.447296567 |

---

## Supporting references

- [S1] Gao LZ, Zhuang J, Nie L, Zhang JB, Zhang Y, Gu N, Wang TH, Feng J, Yang DL, Perrett S, Yan XY (2007) Intrinsic peroxidase-like activity of ferromagnetic nanoparticles. *Nat Nanotechnol* 2: 577–583
- [S2] Tao Y, Lin YH, Huang ZZ, Ren JS, Qu XG (2013) Incorporating graphene oxide and gold nanoclusters: a synergistic catalyst with surprisingly high peroxidase-like activity over a broad pH range and its application for cancer cell detection. *Adv Mater* 25: 2594–2599
- [S3] Lin TR, Zhong LS, Song ZP, Guo LQ, Wu HY, Guo QQ, Chen Y, Fu FF, Chen GN (2014) Visual detection of blood glucose based on peroxidase-like activity of WS<sub>2</sub> nanosheets. *Biosens Bioelectron* 62: 302–307
- [S4] Bhagat S, Srikanth Vallabani N, Shutthanandan V, Bowden M, Karakoti AS, Singh S (2018) Gold core/ceria shell-based redox active nanozyme mimicking the biological multienzyme complex phenomenon. *J Colloid Interface Sci* 513: 831–842
- [S5] Wang Y, Liu RL, Chen GN, Wang L, Yu P, Shu H, Bashir K, Fu Q (2019) Hemin-porous g-C<sub>3</sub>N<sub>4</sub> hybrid nanosheets as an efficient peroxidase mimic for colorimetric and visual determination of glucose. *Microchim Acta* 186: 446
- [S6] Dong YL, Zhang HG, Rahman ZU, Su L, Chen XJ, Hu J, Chen XJ (2012) Graphene oxide-Fe<sub>3</sub>O<sub>4</sub> magnetic nanocomposites with peroxidase-like activity for colorimetric detection of glucose. *Nanoscale* 4: 3969–3976
- [S7] Su L, Feng J, Zhou XM, Ren CL, Li HH, Chen XG (2012) Colorimetric detection of urine glucose based ZnFe<sub>2</sub>O<sub>4</sub> magnetic nanoparticles. *Anal Chem* 84: 5753–5758
